# Supplementary material
Source: HighWire-hosted journal article supplement (https://jnm.snmjournals.org/highwire/filestream/93875/field_highwire_adjunct_files/1/jnm23754_appendix_B.pdf)
Supplement: jnm23754_appendix_B.pdf [file jnm23754_appendix_B.pdf]

Appendix B

S value [Gy/(MBq\*h)] for <sup>90</sup>Y locoregional treatment  
brain regions

|                                 | cavity volume 0.5 ml      |                               | cavity volume 4.2 ml      |                               | cavity volume 7.2 ml      |                               |                        |                        |                        |                        | cavity volume 14.1 ml  |                           | cavity volume 33.5 ml         |                           | cavity volume 65.4 ml         |                           |                               |
|---------------------------------|---------------------------|-------------------------------|---------------------------|-------------------------------|---------------------------|-------------------------------|------------------------|------------------------|------------------------|------------------------|------------------------|---------------------------|-------------------------------|---------------------------|-------------------------------|---------------------------|-------------------------------|
|                                 | geometry 1<br>hypotesis 1 | geometry 1<br>hypotesis 2 f=1 | geometry 1<br>hypotesis 1 | geometry 1<br>hypotesis 2 f=1 | geometry 1<br>hypotesis 1 | geometry 1<br>hypotesis 2 f=1 | geometry 2 d =<br>2 mm | geometry 2 d =<br>3 mm | geometry 2 d =<br>4 mm | geometry 2 d =<br>5 mm | geometry 2 d =<br>6 mm | geometry 1<br>hypotesis 1 | geometry 1<br>hypotesis 2 f=1 | geometry 1<br>hypotesis 1 | geometry 1<br>hypotesis 2 f=1 | geometry 1<br>hypotesis 1 | geometry 1<br>hypotesis 2 f=1 |
| right eye                       | 6.24E-08                  | 8.60E-08                      | 1.28E-07                  | 7.57E-08                      | 8.90E-08                  | 8.14E-08                      | 9.81E-08               | 1.12E-07               | 8.63E-08               | 9.24E-08               | 8.71E-08               | 8.40E-08                  | 8.89E-08                      | 7.60E-08                  | 7.60E-08                      | 9.25E-08                  | 8.69E-08                      |
| left eye                        | 6.00E-08                  | 4.79E-08                      | 5.81E-08                  | 3.10E-08                      | 4.03E-08                  | 7.48E-08                      | 6.22E-08               | 4.45E-08               | 6.68E-08               | 4.40E-08               | 6.06E-08               | 6.32E-08                  | 6.03E-08                      | 4.62E-08                  | 4.62E-08                      | 7.05E-08                  | 6.98E-08                      |
| normal brain (right hemisphere) | 3.78E-07                  | 3.75E-07                      | 4.18E-07                  | 9.25E-07                      | 2.97E-07                  | 3.05E-07                      | 3.05E-07               | 3.11E-07               | 3.11E-07               | 3.17E-07               | 3.30E-07               | 2.74E-07                  | 2.88E-07                      | 2.31E-07                  | 2.31E-07                      | 2.03E-07                  | 2.18E-07                      |
| normal brain (left hemisphere)  | 1.43E-07                  | 1.45E-07                      | 1.47E-07                  | 1.47E-07                      | 1.45E-07                  | 1.49E-07                      | 1.45E-07               | 1.51E-07               | 1.49E-07               | 1.46E-07               | 1.46E-07               | 1.43E-07                  | 1.50E-07                      | 1.39E-07                  | 1.39E-07                      | 2.10E-07                  | 1.39E-07                      |
| skull                           | 2.23E-07                  | 2.18E-07                      | 2.26E-07                  | 2.29E-07                      | 2.25E-07                  | 2.23E-07                      | 2.27E-07               | 2.27E-07               | 2.28E-07               | 2.27E-07               | 2.29E-07               | 2.28E-07                  | 2.32E-07                      | 2.10E-07                  | 2.10E-07                      | 1.86E-07                  | 2.07E-07                      |
| right optical nerve             | 2.23E-07                  | 2.16E-07                      | 1.02E-07                  | 1.23E-07                      | 1.26E-07                  | 1.61E-07                      | 1.20E-07               | 1.32E-07               | 1.04E-07               | 1.58E-07               | 1.03E-07               | 1.04E-07                  | 1.07E-07                      | 1.47E-07                  | 1.47E-07                      | 1.68E-07                  | 1.05E-07                      |
| left optical nerve              | 4.30E-08                  | 7.54E-08                      | 4.64E-08                  | 1.37E-07                      | 7.92E-08                  | 9.04E-08                      | 4.76E-08               | 7.67E-08               | 6.50E-08               | 8.05E-08               | 9.31E-08               | 5.45E-08                  | 9.41E-08                      | 6.08E-08                  | 6.08E-08                      | 8.09E-08                  | 6.76E-08                      |
